# Supplementary material for: Social Network Analysis Predicts Health Behaviours and Self-Reported Health in African Villages
Source: PLoS One. 2014 Jul 29;9(7):e103500. doi: 10.1371/journal.pone.0103500 (PMC4114748; doi:10.1371/journal.pone.0103500)
Supplement: Study Data S1 — Excel file of data used in this paper. (XLS) [file pone.0103500.s003.xls]

## Sheet: Regression Vars
village_id	household_id	betweenness_fr	in_deg_fr	total_people_sick	medical_care	health_decision_susceptibility	poor_preventative_health	years_in_village	social_status	home_quality_score	agriculture	village_id_d1	village_id_d2	village_id_d3	village_id_d4	village_id_d5	village_id_d6	village_id_d7
13111	1	0.214286	1	4	18000	0	2	2	1	4	0	1	0	0	0	0	0	0
13111	3	0	0	3	3000	0	1	7	0	5	0	1	0	0	0	0	0	0
13111	5	0.196429	1	4	5000	1	0	7	1	5	1	1	0	0	0	0	0	0
13111	6	0	0	1	1230	0	2	10	0	5	0	1	0	0	0	0	0	0
13111	7	0	1	3	1500	0	1	2	0	5	0	1	0	0	0	0	0	0
13111	11	0.214286	2	2	6000	1	0	24	1	5	1	1	0	0	0	0	0	0
13111	12	0.339286	4	0	8000	1	0	2	1	9	0	1	0	0	0	0	0	0
13111	14	0	1	0	0	1	4	11	0	10	0	1	0	0	0	0	0	0
13111	15	0	1	4	4000	0	0	2	0	4	0	1	0	0	0	0	0	0
13233	1	0	1	1	1500	0	0	8	1	5	0	0	1	0	0	0	0	0
13233	2	0	2	3	2300	0	1	2	0	5	0	0	1	0	0	0	0	0
13233	4	0	0	1	500	1	3	22	1	5	1	0	1	0	0	0	0	0
13233	5	0	0	1	13000	0	1	29	1	8	0	0	1	0	0	0	0	0
13233	6	0	1	0	8000	0	0	1	1	3	0	0	1	0	0	0	0	0
13233	7	0	0	0	800	1	2	9	0	7	0	0	1	0	0	0	0	0
13233	8	0.0476191	1	0	3000	1	3	16	0	5	0	0	1	0	0	0	0	0
13233	9	0	0	0	11000	1	4	3	1	5	0	0	1	0	0	0	0	0
13233	10	0	4	1	5000	0	2	32	1	6	1	0	1	0	0	0	0	0
13233	11	0	0	0	3500	0	2	35	1	5	0	0	1	0	0	0	0	0
13233	13	0	1	0	3600	1	2	3	0	3	1	0	1	0	0	0	0	0
13233	14	0	1	2	1800	1	2	5	0	5	0	0	1	0	0	0	0	0
13245	1	0	3	1	17000	0	2	40	1	3	1	0	0	1	0	0	0	0
13245	2	0	0	0	2500	1	3	0	0	5	0	0	0	1	0	0	0	0
13245	3	0.0178571	2	2	2700	0	1	4	0	3	0	0	0	1	0	0	0	0
13245	5	0	2	3	1800	0	2	3	0	3	0	0	0	1	0	0	0	0
13245	7	0	1	1	1500	0	2	6	0	3	0	0	0	1	0	0	0	0
13245	9	0	0	0	8500	0	3	20	1	3	1	0	0	1	0	0	0	0
13245	10	0.0357143	2	0	1000	1	4	7	1	3	1	0	0	1	0	0	0	0
13245	12	0.107143	4	1	4000	0	1	6	0	3	0	0	0	1	0	0	0	0
13245	13	0	1	0	100	0	3	22	0	3	1	0	0	1	0	0	0	0
13247	1	0.295139	4	2	7000	1	3	37	0	2	1	0	0	0	1	0	0	0
13247	2	0.158565	3	0	800	1	0	31	1	3	0	0	0	0	1	0	0	0
13247	3	0.175926	2	0	1200	1	0	0	1	3	0	0	0	0	1	0	0	0
13247	4	0.0231481	4	4	14000	1	4	8	1	3	0	0	0	0	1	0	0	0
13247	5	0	0	1	600	0	4	6	0	3	0	0	0	0	1	0	0	0
13247	6	0.114583	4	2	11199	0	2	6	1	10	0	0	0	0	1	0	0	0
13247	7	0	2	1	350	0	4	8	1	3	0	0	0	0	1	0	0	0
13247	8	0.163194	3	0	1000	1	0	26	1	3	1	0	0	0	1	0	0	0
13247	9	0.0138889	1	0	0	1	2	6	0	3	1	0	0	0	1	0	0	0
13247	10	0	0	0	0	1	2		0	2	0	0	0	0	1	0	0	0
26007	1	0	2	1	500	0	3	2	1	3	0	0	0	0	0	1	0	0
26007	5	0.15	2	8	14500	1	1	6	1	8	0	0	0	0	0	1	0	0
26007	6	0	0	0	3600	1	0	11	1	7	0	0	0	0	0	1	0	0
26007	7	0	0	0	0	1	2	4	0	6	0	0	0	0	0	1	0	0
26007	8	0.3	4	4	21000	1	1	1	0	9	0	0	0	0	0	1	0	0
26007	9	0.2	2	3	10000	0	0	17	0	7	1	0	0	0	0	1	0	0
26016	2	0.0779221	4	3	800	1	3	24	0	5	0	0	0	0	0	0	1	0
26016	5	0.0151515	5	4	5500	1	4	17	1	7	0	0	0	0	0	0	1	0
26016	6	0.012987	1	0	2500	0	2	12	0	5	0	0	0	0	0	0	1	0
26016	7	0.0021645	2	0	500	1	1	21	0	7	0	0	0	0	0	0	1	0
26016	9	0	1	0	350	1	1	20	0	5	0	0	0	0	0	0	1	0
26016	10	0	0	4	5000	0	2	22	0	5	0	0	0	0	0	0	1	0
26016	11	0	3	1	7800	1	1	36	1	5	1	0	0	0	0	0	1	0
26016	12	0.0497836	2	0	10100	1	0	56	1	4	0	0	0	0	0	0	1	0
26016	14	0.0779221	2	2	3700	1	0	22	1	10	1	0	0	0	0	0	1	0
26016	15	0	0	0	1500	1	3	25	0	3	1	0	0	0	0	0	1	0
26016	16	0	0	2	7000	1	3	33	0	5	0	0	0	0	0	0	1	0
26016	17	0.00865801	2	2	2000	0	2	23	1	5	1	0	0	0	0	0	1	0
26016	18	0	0	3	6000	0	3	19	1	5	0	0	0	0	0	0	1	0
26016	19	0	1	0	200	0	1	40	1	6	1	0	0	0	0	0	1	0
26016	20	0.0119048	1	1	1800	1	3	2	0	3	0	0	0	0	0	0	1	0
26016	21	0	2	1	0	0	2		0	9	1	0	0	0	0	0	1	0
26016	22	0	0	0	800	1	1	39	1	5	0	0	0	0	0	0	1	0
26016	23	0	1	2	2600	0	3	31	0	5	1	0	0	0	0	0	1	0
26016	24	0	0	0	0	0	2	18	0	5	0	0	0	0	0	0	1	0
26016	25	0.0119048	1	0	300	1	0	44	0	7	1	0	0	0	0	0	1	0
26016	26	0.04329	2	2	3500	1	2	34	1	4	0	0	0	0	0	0	1	0
26016	27	0	0	0	500	0	1	40	1	3	0	0	0	0	0	0	1	0
26016	28	0	2	2	8000	0	2	8	1	9	1	0	0	0	0	0	1	0
26016	29	0.012987	2	0	500	0	2	22	1	5	0	0	0	0	0	0	1	0
26016	30	0.0021645	1	0	3500	1	3	60	1	5	1	0	0	0	0	0	1	0
26036	1	0	4	1	2000	0	1	8	1	8	0	0	0	0	0	0	0	1
26036	2	0.0272727	1	2	900	1	0	1	0	4	0	0	0	0	0	0	0	1
26036	4	0.00909091	1	0	5000	1	3	8	1	5	0	0	0	0	0	0	0	1
26036	5	0	1	0	5800	1	2	5	0	3	0	0	0	0	0	0	0	1
26036	6	0	0	0	500	0	2	2	0	5	0	0	0	0	0	0	0	1
26036	8	0	1	3	3800	1	3	2	1	3	0	0	0	0	0	0	0	1
26036	9	0	0	0	1800	1	0	5	0	6	0	0	0	0	0	0	0	1
26036	11	0	0	1	23000	1	3	8	1	3	0	0	0	0	0	0	0	1
26036	12	0	1	1	500	0	2	11	0	3	0	0	0	0	0	0	0	1
26036	13	0.0363636	2	0	1100	1	0	24	1	3	1	0	0	0	0	0	0	1
26036	14	0.0272727	1	0	900	1	0	2	0	3	1	0	0	0	0	0	0	1
26036	15	0	3	1	7500	1	2	3	1	3	0	0	0	0	0	0	0	1

## Sheet: Network links
village_id	household_id_sendingnode	household_id_receivingnode
13111	1	11
13111	3	12
13111	5	7
13111	5	11
13111	5	12
13111	6	12
13111	6	14
13111	11	5
13111	12	1
13111	12	15
13111	15	12
13233	1	6
13233	4	2
13233	5	10
13233	6	1
13233	7	8
13233	8	10
13233	8	13
13233	9	2
13233	9	10
13233	11	14
13233	13	10
13245	2	1
13245	2	2
13245	2	3
13245	2	7
13245	3	1
13245	3	12
13245	9	10
13245	9	12
13245	10	5
13245	10	12
13245	10	13
13245	12	1
13245	12	3
13245	13	5
13245	13	10
13245	13	12
13247	1	4
13247	1	7
13247	1	8
13247	1	9
13247	2	3
13247	2	4
13247	2	6
13247	3	1
13247	3	2
13247	3	6
13247	3	8
13247	4	6
13247	5	1
13247	6	2
13247	6	4
13247	8	1
13247	8	2
13247	8	3
13247	8	4
13247	9	1
13247	9	6
13247	9	7
13247	10	8
26007	1	8
26007	5	8
26007	5	9
26007	6	8
26007	7	5
26007	8	1
26007	8	9
26007	9	1
26007	9	5
26007	9	8
26016	2	2
26016	2	14
26016	5	7
26016	6	2
26016	7	5
26016	10	2
26016	10	7
26016	12	2
26016	12	11
26016	12	17
26016	12	29
26016	14	19
26016	14	26
26016	15	26
26016	15	30
26016	16	9
26016	17	5
26016	18	17
26016	18	18
26016	18	23
26016	18	28
26016	20	11
26016	20	12
26016	20	21
26016	22	2
26016	24	5
26016	24	20
26016	24	25
26016	25	5
26016	25	12
26016	25	29
26016	26	11
26016	26	28
26016	27	14
26016	29	5
26016	29	6
26016	30	21
26036	2	13
26036	4	1
26036	4	12
26036	5	5
26036	6	1
26036	6	2
26036	8	15
26036	9	1
26036	9	8
26036	9	15
26036	11	1
26036	11	4
26036	11	5
26036	13	14
26036	14	13
26036	14	15
